# Supplementary material for: SOX2 regulates common and specific stem cell features in the CNS and endoderm derived organs
Source: PLoS Genet. 2018 Feb 12;14(2):e1007224. doi: 10.1371/journal.pgen.1007224 (PMC5825159; doi:10.1371/journal.pgen.1007224)
Supplement: S3 Table — (XLSX) [file pgen.1007224.s009.xlsx]

## Sheet: Common_AnyEndo_AnyNeuro
S3 Table: mm9 coordinates and nearest gene of common peaks found in at least one neural and one endoderm ChIP-seq experiment
Sox2 peak position	Nearest gene and distance to TSS
chr1:101358171-101358371	Cntnap5b (-311071)
chr1:121202251-121202451	Inhbb (+116474)
chr1:122254051-122254311	C1ql2 (+17022)
chr1:134219421-134219621	Nuak2 (+6818)
chr1:135294331-135294551	Sox13 (-4594)
chr1:135592591-135592791	Lax1 (-6098)
chr1:173470481-173470681	Itln1 (-5156)
chr1:173470861-173471061	Itln1 (-5536)
chr1:173472651-173472851	Itln1 (-7326)
chr1:197067691-197068031	Cr2 (-64952)
chr1:26743821-26744021	4931408C20Rik (+384)
chr1:26744071-26744271	4931408C20Rik (+134)
chr1:34062611-34062831	Dst (-5949)
chr1:48938311-48938531	C230029F24Rik (-363039)
chr1:58670731-58670931	Ndufb3 (+27603)
chr1:68723161-68723361	Erbb4 (+431069)
chr1:72353771-72353971	Xrcc5 (-124)
chr1:88384071-88384271	Ptma (-39140)
chr1:88423061-88423271	Ptma (-145)
chr1:97348351-97348551	Fam174a (+138246)
chr2:115340891-115341091	BC052040 (-66461)
chr2:122506911-122507111	Slc30a4 (+21364)
chr2:122507521-122507721	Slc30a4 (+20754)
chr2:126962791-126962991	Ncaph (-3201)
chr2:137055441-137055641	Jag1 (-113161)
chr2:156005931-156006131	Rbm39 (-57)
chr2:20469391-20469591	Etl4 (+28073)
chr2:24981771-24981971	Noxa1 (-31202)
chr2:25036131-25036331	Nrarp (-47)
chr2:33637311-33637511	Mvb12b (+106055)
chr2:34726471-34726671	Psmd5 (-112)
chr2:52579511-52579711	Stam2 (+21623)
chr2:5300271-5300541	Ccdc3 (+241584)
chr2:69256511-69256711	Dhrs9 (+38109)
chr2:73991021-73991221	Atp5g3 (-241738)
chr2:75908451-75908691	Ttc30a1 (-88547)
chr3:105762171-105762391	Wdr77 (-6)
chr3:107434641-107434841	Strip1 (-113)
chr3:107734631-107734831	Gstm7 (+4)
chr3:108085371-108085651	Sort1 (-1498)
chr3:113333041-113333241	Rnpc3 (-74)
chr3:126960501-126960701	Ank2 (+151348)
chr3:151873191-151873391	Fubp1 (-192)
chr3:19306291-19306551	Pde7a (-95099)
chr3:20886021-20886221	NONE
chr3:33804291-33804661	Ccdc39 (-61253)
chr3:34564211-34564411	Sox2 (+15384)
chr3:5860551-5860751	Pex2 (-284412)
chr3:8244611-8244811	Stmn2 (-264816)
chr3:8245731-8245931	Stmn2 (-263696)
chr3:8246381-8246581	Stmn2 (-263046)
chr3:86505071-86505271	Mab21l2 (-152966)
chr3:87689651-87689901	Prcc (-246)
chr3:8866231-8866451	Mrps28 (+57577)
chr3:89031291-89031511	Muc1 (-1578)
chr3:95392631-95392851	Golph3l (-115)
chr3:97101881-97102081	Bcl9 (-70694)
chr4:111453171-111453371	Spata6 (+60682)
chr4:115893651-115893871	Pik3r3 (-505)
chr4:122728081-122728281	Trit1 (+34341)
chr4:124546471-124546671	Maneal (-7156)
chr4:127096571-127096771	Gjb5 (-61246)
chr4:128488651-128488851	Zfp362 (-5462)
chr4:135696531-135696731	Id3 (-2781)
chr4:145029711-145029951	Gm13225 (-70831)
chr4:145036751-145036951	Gm13225 (-63811)
chr4:145037281-145037481	Gm13225 (-63281)
chr4:146023011-146023211	Gm13051 (-41635)
chr4:146024091-146024291	Gm13051 (-40555)
chr4:146024571-146024771	Gm13051 (-40075)
chr4:146900491-146900691	Gm16503 (-13736)
chr4:153845921-153846211	Prdm16 (+164909)
chr4:28104011-28104211	NONE
chr4:3017431-3017761	Vmn1r2 (-81581)
chr4:3018221-3018421	Vmn1r2 (-80856)
chr4:34882971-34883171	Cga (+42043)
chr4:35832801-35833001	Lingo2 (-40456)
chr4:44041431-44041631	Clta (+15981)
chr4:44864881-44865081	Zcchc7 (+95541)
chr4:54400451-54400651	NONE
chr4:64158911-64159111	Tnc (-477252)
chr4:81950361-81950561	Nfib (+200751)
chr4:82401921-82402121	Zdhhc21 (+103556)
chr4:83170571-83170771	Ccdc171 (-778)
chr4:95351451-95351671	Fggy (+127363)
chr4:97775291-97775691	Tm2d1 (+274506)
chr5:108494491-108494691	Mtf2 (-170)
chr5:113562351-113562551	2900026A02Rik (+29920)
chr5:124171081-124171281	Zcchc8 (-128)
chr5:136021221-136021421	Hip1 (-329)
chr5:139407831-139408031	Pdgfa (+62976)
chr5:141087151-141087391	Lfng (+3976)
chr5:147072581-147072831	Cdk8 (+29842)
chr5:149864591-149864791	Hmgb1 (-75)
chr5:99813671-99813871	Rasgef1b (-131825)
chr6:127097891-127098091	Ccnd2 (+3075)
chr6:136419031-136419231	Atf7ip (-48241)
chr6:143889971-143890171	Sox5 (+267929)
chr6:149080931-149081141	Gm10203 (+2344)
chr6:3151411-3151631	Samd9l (+198050)
chr6:47596871-47597151	Ezh2 (-51982)
chr6:47731571-47731811	Pdia4 (+31820)
chr6:52115091-52115291	Hoxa2 (+221)
chr6:54959711-54959921	Ggct (-16872)
chr6:71583131-71583331	Kdm3a (-332)
chr6:83781801-83782061	Paip2b (-196)
chr6:88874931-88875131	Tpra1 (+22786)
chr7:119931971-119932171	Tead1 (+109237)
chr7:119967171-119967521	Tead1 (+144512)
chr7:119969831-119970031	Tead1 (+147097)
chr7:119985531-119985791	Tead1 (+162827)
chr7:122645151-122645381	Sox6 (+493334)
chr7:125737371-125737571	Tmc7 (-9221)
chr7:128125871-128126071	4933427G17Rik (-52)
chr7:134248151-134248381	AI467606 (+13316)
chr7:135019051-135019251	Zfp668 (+1191)
chr7:152125551-152125751	Ccnd1 (+123)
chr7:29123691-29123891	Supt5 (-53)
chr7:31374051-31374251	Wbp7 (-406)
chr7:51518191-51518391	Acpt (-5543)
chr7:51926411-51926611	Myh14 (-5640)
chr7:6737121-6737321	Peg3 (-54089)
chr8:115430671-115430871	Cntnap4 (+336828)
chr8:126808291-126808631	Galnt2 (+53170)
chr8:23918231-23918431	1700041G16Rik (-416)
chr8:27637091-27637291	Thap1 (+368507)
chr8:48325791-48326021	Stox2 (+48850)
chr8:83328121-83328321	Smarca5 (-64825)
chr8:92560421-92560621	Tox3 (+311721)
chr8:92593481-92593681	Tox3 (+278661)
chr9:108419271-108419471	Qrich1 (-47)
chr9:110183711-110183921	Elp6 (-23880)
chr9:13486171-13486391	Maml2 (+61847)
chr9:41420271-41420481	Ubash3b (-454231)
chr9:4376231-4376431	Msantd4 (-281)
chr9:51957601-51957801	Zc3h12c (+18515)
chr9:54711351-54711551	Ireb2 (-111)
chr9:57315811-57316011	Scamp5 (-80)
chr9:59334391-59334591	Arih1 (-70)
chr9:63807031-63807231	Smad6 (+62735)
chr10:100852951-100853151	NONE
chr10:119854301-119854501	Hmga2 (+59124)
chr10:12827941-12828251	Plagl1 (+17502)
chr10:21862361-21862671	E030030I06Rik (+6113)
chr10:25628531-25628731	Tmem200a (+85544)
chr10:26610411-26610631	Arhgap18 (+118238)
chr10:39379651-39379851	Traf3ip2 (+47011)
chr10:43300611-43300831	Cd24a (+1746)
chr10:6240481-6240711	Mthfd1l (+132814)
chr10:6482821-6483021	Mthfd1l (-109511)
chr10:79896731-79896931	Tcf3 (-443)
chr10:83377631-83377831	1500009L16Rik (+192121)
chr11:108873031-108873261	Axin2 (+91483)
chr11:113301011-113301281	Slc39a11 (+125936)
chr11:119161371-119161571	Eif4a3 (-68)
chr11:14082091-14082311	NONE
chr11:34495211-34495491	Dock2 (+102043)
chr11:34755301-34755501	Spdl1 (-108258)
chr11:3996711-3996911	Mtfp1 (-1363)
chr11:4749571-4749771	Nf2 (-132)
chr11:53113911-53114111	Hspa4 (-52)
chr11:53953491-53953731	P4ha2 (+39146)
chr11:53954051-53954251	P4ha2 (+39686)
chr11:62427261-62427531	Fam211a (+34629)
chr11:68851371-68851571	Aurkb (-7683)
chr11:86922331-86922531	Prr11 (-221)
chr11:87236571-87236771	Tex14 (+18104)
chr11:88170341-88170541	1700106J16Rik (+62896)
chr11:97811451-97811651	Plxdc1 (+36162)
chr11:98063901-98064101	Cdk12 (-648)
chr11:98974451-98974771	Tns4 (-23991)
chr12:12687581-12687811	Rpl36-ps3 (-231096)
chr12:12731951-12732181	Rpl36-ps3 (-186726)
chr12:29502351-29502551	Tssc1 (+65758)
chr12:74441651-74441851	Slc38a6 (+53985)
chr12:75904831-75905031	Kcnh5 (+373388)
chr12:75905101-75905411	Kcnh5 (+373063)
chr12:77023811-77024011	Syne2 (+104606)
chr12:84972941-84973171	Rbm25 (-128)
chr12:85350171-85350401	Acot1 (-166)
chr12:8928331-8928551	Laptm4a (+311)
chr13:100560871-100561121	Cartpt (+109642)
chr13:103163191-103163391	Cd180 (-320347)
chr13:20274271-20274471	Elmo1 (+91883)
chr13:27024711-27024921	Prl (-124623)
chr13:3372281-3372481	Gdi2 (-164940)
chr13:3372741-3372971	Gdi2 (-164465)
chr13:41090411-41090611	Pak1ip1 (-5881)
chr13:41447861-41448061	Nedd9 (+1590)
chr13:51941811-51942011	Gadd45g (-136)
chr13:55506891-55507101	Slc34a1 (+5987)
chr13:63728631-63728831	Ptch1 (-61903)
chr13:63728871-63729071	Ptch1 (-62143)
chr13:98992931-98993171	Arhgef28 (-16931)
chr14:118629551-118629821	Sox21 (+5624)
chr14:118629831-118630031	Sox21 (+5379)
chr14:118965541-118965741	Abcc4 (+139800)
chr14:17566121-17566351	Rarb (+85145)
chr14:23499371-23499651	NONE
chr14:27489291-27489491	Pde12 (-59)
chr14:65864351-65864611	Fzd3 (+16819)
chr14:73638201-73638401	Lpar6 (+603)
chr14:9119021-9119311	Fam107a (+23127)
chr15:101814741-101814941	Krt8 (+19932)
chr15:25682391-25682661	Fam134b (-90493)
chr15:79913851-79914051	Rpl3 (-115)
chr15:90880671-90880891	Kif21a (-51982)
chr16:10975051-10975311	Litaf (+18033)
chr16:16560231-16560481	Fgd4 (-44)
chr16:29876431-29876631	Hes1 (-188895)
chr16:30129991-30130191	Hes1 (+64665)
chr16:5145671-5145881	Sec14l5 (-1426)
chr16:73117651-73117851	Robo1 (+454357)
chr16:90459711-90459911	Hunk (+73169)
chr17:15345151-15345371	2210404J11Rik (+166656)
chr17:24097371-24097591	Sbpl (-5595)
chr17:33897361-33897561	Rab11b (+14)
chr17:5660571-5660771	Zdhhc14 (+168071)
chr17:63212171-63212371	Efna5 (+18395)
chr18:34050251-34050451	Epb4.1l4a (+116509)
chr18:3839851-3840051	Lyzl1 (-325879)
chr18:54987791-54987991	Zfp608 (+161943)
chr18:55071111-55071331	Zfp608 (+78613)
chr18:61866491-61866691	Pcyox1l (+698)
chr18:9216171-9216481	Fzd8 (+3472)
chr19:16428401-16428601	Gna14 (-81656)
chr19:24299961-24300161	Tjp2 (-617)
chr19:41925151-41925351	Frat2 (-2629)
chr19:44589681-44589881	Wnt8b (+21819)
chr19:61275481-61275771	Gm6020 (+15833)
chrX:109484431-109484701	Satl1 (+35822)
chrX:99314511-99314711	Pin4 (-175)
